# Supplementary material
Source: PubMed Central journal article supplement (PMC9077059)
Supplement: ajcr0012-1606-f5.pdf [file ajcr0012-1606-f5.pdf]

## Proton beam radiotherapy and ICI for HCC

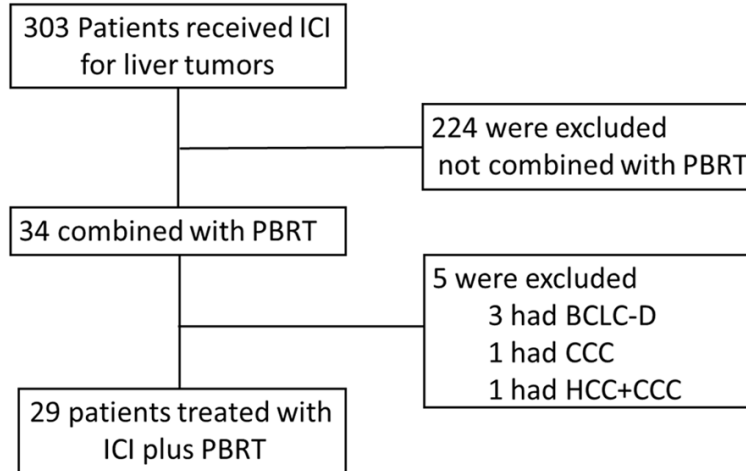

**Supplementary Figure 1.** Patient selection of the study. ICI, Immune Check Point Inhibitor; PBRT, Proton Beam Radiation Therapy; BCLC, Barcelona Clinic Liver Cancer; HCC, Hepatocellular Carcinoma; CCC, Cholangiocarcinoma.

**Supplementary Table 1.** Therapeutic summary of immune checkpoint inhibitors and proton beam radiotherapy

| Treatment                                  | N = 29, n (%) |
|--------------------------------------------|---------------|
| Immune checkpoint inhibitor                |               |
| Anti-PD1 monotherapy                       |               |
| Nivolumab                                  | 15 (51.7)     |
| Pembrolizumab                              | 2 (6.9)       |
| Combo-immunotherapy                        |               |
| Nivolumab-Sorafenib                        | 2 (6.9)       |
| Nivolumab-Lenvatinib                       | 2 (6.9)       |
| Nivolumab-Bevacizumab                      | 2 (6.9)       |
| Atezolizumab-Bevacizumab                   | 4 (13.8)      |
| Nivolumab-Ipilimumab                       | 2 (6.9)       |
| Proton beam radiotherapy                   |               |
| 66 grays/10 fractions (BED = 109.6 grays)  | 3 (10.3)      |
| 72.6 grays/22 fractions (BED = 96.6 grays) | 18 (62.1)     |
| 60 grays/10 fractions (BED = 96.0 grays)   | 2 (6.9)       |
| 50 grays/10 fractions (BED = 75.0 grays)   | 2 (6.9)       |
| 45 grays/10 fractions (BED = 65.3 grays)   | 1 (3.4)       |
| 33 grays/5 fractions (BED = 54.8 grays)    | 2 (6.9)       |
| 33 grays/10 fractions (BED = 43.9 grays)   | 1 (3.4)       |

Abbreviations: PD1, Programmed Death-1; BED, Biological Effective Dose.

## Proton beam radiotherapy and ICI for HCC

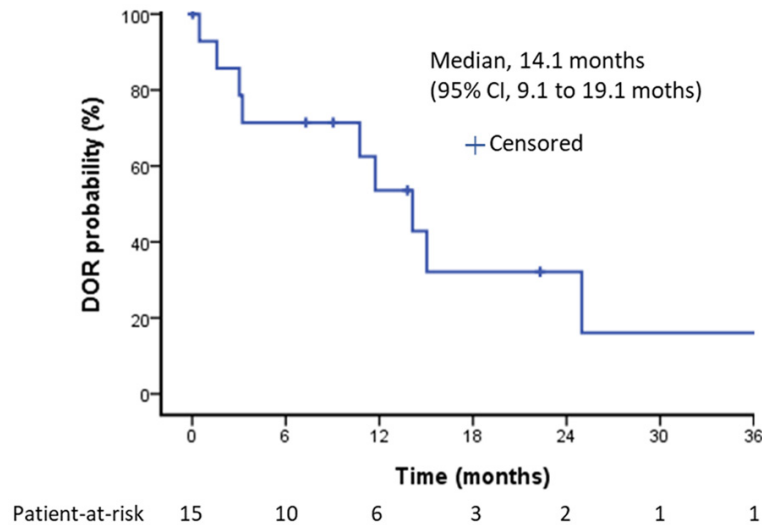

**Supplementary Figure 2.** Kaplan-Meier estimates of DOR for responders. DOR, Duration of Response.

**Supplementary Table 2.** Reasons for stopping immune checkpoint inhibitor

| Reasons                                          | No. (%) |
|--------------------------------------------------|---------|
| Treatment ongoing                                | 2 (7)   |
| Discontinued treatment                           | 27 (93) |
| Primary reason discontinued treatment            |         |
| Radiologic disease progression                   | 9 (31)  |
| Clinical disease progression                     | 3 (10)  |
| Adverse events                                   | 5 (17)  |
| Complete remission                               | 4 (14)  |
| Liver transplantation after partial remission    | 1 (3)   |
| Patient choice                                   | 1 (3)   |
| Lost to follow-up*                               | 4 (14)  |
| Discontinued treatment but in survival follow-up | 7 (24)  |

\*Two international medical service patients went back to their countries continuing treatment.

**Supplementary Table 3.** Subsequent anti-tumor therapy after immune checkpoint inhibitor plus proton beam radiotherapy

| Treatments                                         | No. (%) |
|----------------------------------------------------|---------|
| ≥ 1 Anticancer treatment during survival follow-up | 10 (34) |
| Systemic treatment                                 | 7 (24)  |
| Sorafenib                                          | 1 (3)   |
| Lenvatinib                                         | 3 (10)  |
| Regorafenib                                        | 1 (3)   |
| Pembrolizumab                                      | 3 (10)  |
| Chemotherapy                                       | 1 (3)   |
| Investigational drug                               | 2 (7)   |
| Locoregional treatment                             | 6 (21)  |
| Transarterial chemoembolization                    | 1 (3)   |
| Radiofrequency Ablation                            | 2 (7)   |
| Proton beam radiation therapy                      | 2 (7)   |
| Liver transplantation                              | 1 (3)   |
